# Supplementary material
Source: MDPI journal article supplement (https://www.mdpi.com/1424-2818/13/9/427)
Supplement: s1 [file s1]

## Supplementary Material

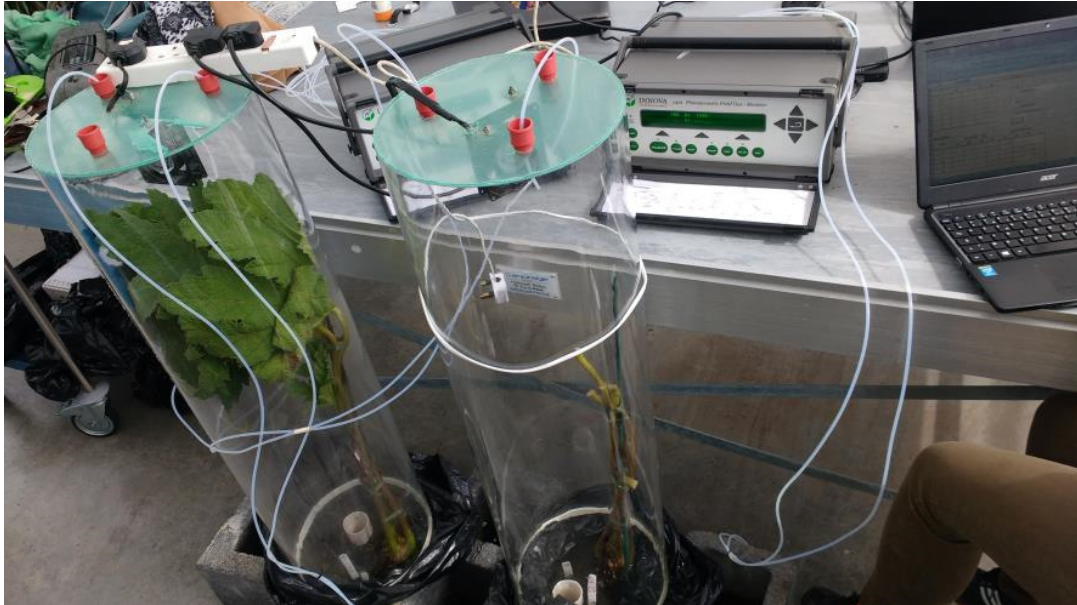

**Figure S1:** Greenhouse gas emissions sampling with photoacoustic gas analyser at UCD's Rosemount Environmental Research Station glasshouse on July 2017, in CON (control) and CW (leaf removal + waterlogging). Photo: MC Mantoani.
